# Supplementary material for: Bta-miR-484 Targets SFRP1 and Affects Preadipocytes Proliferation, Differentiation, and Apoptosis
Source: MDPI journal article supplement (doi:10.3390/ijms241612710), 2023-08-11
Supplement: s1 [file s1]

**Table S1.** Oligonucleotide primer sequences used for quantitative real-time polymerase chain reaction.

| Gene               | Primer sequence                                                   | Annealing temperature/°C |
|--------------------|-------------------------------------------------------------------|--------------------------|
| <i>bta-miR-484</i> | RT: GTCGTATCCAGTGC GTGTCGT<br>GGAGTCGGCAATTGCACTGGATACGACATCGGGAG | -                        |
| <i>bta-miR-484</i> | F: GAATACTCAGGCTCAGTCCC<br>R: CAGTGCGTGTCGTGGAGT                  | 60                       |
| <i>U6</i>          | F: GCTTCGGCAGCACATATACTAAAAT<br>R: CGCTTCACGAATTTGCGTGTCAT        | 60                       |
| <i>SFRP1</i>       | F:GCTCAAGTGCGACAAGTTTC<br>R:GCTCAATGATGGCTTCAGAC                  | 60                       |
| <i>C/EBPα</i>      | F: TGGACAAGAACAGCAACGAG<br>R: TTGTCAGTGGTCAGCTCCAG                | 60                       |
| <i>FABP4</i>       | F: AAGTCAAGAGCATCGTAA<br>R: CCAGCACCATCTTATCAT                    | 60                       |
| <i>LPL</i>         | F: ACGATTATTGCTCAGCATGG<br>R: ACTTTGTACAGGCACAACCG                | 60                       |
| <i>GAPDH</i>       | F: ACTCTGGCAAAGTGGATGTTGTC<br>R: GCATCACCCCACTTGATGTTG            | 60                       |
| <i>PCNA</i>        | F: TCCAGAACAAGAGTATAGC<br>R: TACAACAGCATCTCCAAT                   | 60                       |
| <i>CDK2</i>        | F: TTTGCTGAGATGGTGACCCG<br>R: TAACTCCTGGCCAAACCACC                | 60                       |
| <i>Bax</i>         | F: GAGATGAATTGGACAGTAAC<br>R: TTGAAGTTGCCGTCAGAA                  | 60                       |
| <i>Caspase 3</i>   | F: CAGCGTCGTAGCTGAACGTA<br>R: CCAGAGTCCATTGATTTGCTTCC             | 60                       |
| <i>Caspase 9</i>   | F: TGGTGGTCATCCTGTCTC<br>R: CATCCATCTGTGCCATAAAC                  | 60                       |
