# Supplementary material for: Bta-miR-484 Targets SFRP1 and Affects Preadipocytes Proliferation, Differentiation, and Apoptosis
Source: MDPI journal article supplement (doi:10.3390/ijms241612710), 2023-08-11
Supplement: s1 [file s1]

**Table S3.** Primers information of qPCR to verify sequencing results.

| Gene           | Primer sequence             | Annealing temperature/°C |
|----------------|-----------------------------|--------------------------|
| <i>HSPB7</i>   | F: CCCTGGGAGACGCCTATGA      | 60                       |
|                | R: TGTGGTTGTTGGAGGTGGTG     |                          |
| <i>SFRP1</i>   | F: GCTCAAGTGCGACAAGTTTC     | 60                       |
|                | R: GCTCAATGATGGCTTCAGAC     |                          |
| <i>CIQTNF2</i> | F: CTCAGGAATGGTGGGAAGAA     | 60                       |
|                | R: CACCGCTGACACCTTTGG       |                          |
| <i>RAB3A</i>   | F: TTTCCTCTTCCGCTATGC       | 60                       |
|                | R: GGACTCCTCGTTGGTAATG      |                          |
| <i>TCEA3</i>   | F: AGATCAAACAGCAGCAAATCA    | 60                       |
|                | R: TGTAATCATCATCCGCCTTC     |                          |
| <i>FGFR2</i>   | F: AACTGTATATGATGATGAGAG    | 60                       |
|                | R: ATCCAAGTCTTCTACCAA       |                          |
| <i>BDNF</i>    | F: CATGGGACTCTGGAGAGCAT     | 60                       |
|                | R: CAAAGGCACTTCACTGCTGA     |                          |
| <i>STRADB</i>  | F: GCAGGTTTCCTTTCCAAGAC     | 60                       |
|                | R: TATTACGGTGCGAGTTCC       |                          |
| <i>KCNMB3</i>  | F: TTCTCGGTCCTAATGTTCT      | 60                       |
|                | R: ACAGTCCGTCCAGTCATC       |                          |
| <i>APOA1</i>   | F: ACCGTGTATGTGGAAGCAATCAAG | 60                       |
|                | R: TCCCAGTTGTCCAGGAGTTTCAG  |                          |
| <i>FGFR3</i>   | F: GTCCTTGGAGTCCAGCTCATC    | 60                       |
|                | R: TATCCGTGGCGTCATCTTTC     |                          |
