# Supplementary material for: Bta-miR-484 Targets SFRP1 and Affects Preadipocytes Proliferation, Differentiation, and Apoptosis
Source: MDPI journal article supplement (doi:10.3390/ijms241612710), 2023-08-11
Supplement: s1 [file s1]

**Table S2.** antibodies information of Western blot.

| Name of antibody     | Dilution rate | Company        | Product code |
|----------------------|---------------|----------------|--------------|
| PCNA                 | 1:500         | Sangon Biotech | D220014-0025 |
| CDK2                 | 1:500         | Abways         | cy5020       |
| FABP4                | 1:500         | Abways         | CY6768       |
| Caspase-3            | 1:1000        | Beyotime       | AC030        |
| Bax                  | 1:1000        | Abways         | CY5059       |
| GAPDH                | 1:2000        | Abways         | AB0036       |
| Goat anti-Rabbit IgG | 1:20,000      | Sangon Biotech | D111018      |
